# Supplementary material for: Role of N-Cadherin in Epithelial-to-Mesenchymal Transition and Chemosensitivity of Colon Carcinoma Cells
Source: MDPI journal article supplement (doi:10.3390/cancers14205146), 2022-10-20
Supplement: s1 [file s1]

## Supplementary Material

**Supplementary Table S2: Differentially expressed miRNA ( $|FC| \geq 2$ ) between HCT8 NC and HCT8 CTRL tumor samples**

| miRNA name      | adj. <i>p</i> value | <i>p</i> value | Fold change<br>(HCT8 NC/HCT8 CTRL) | Regulation | miRBase accession<br>number |
|-----------------|---------------------|----------------|------------------------------------|------------|-----------------------------|
| hsa-miR-15b-5p  | NS                  | NS             | 2.37                               | up         | MIMAT0000417                |
| hsa-let-7g-5p   | NS                  | NS             | 2.33                               | up         | MIMAT0000414                |
| hsa-let-7f-5p   | NS                  | NS             | 2.33                               | up         | MIMAT0000067                |
| hsa-let-7b-5p   | NS                  | NS             | 2.31                               | up         | MIMAT0000063                |
| hsa-miR-199a-5p | NS                  | NS             | 2.26                               | up         | MIMAT0000231                |
| hsa-let-7c-5p   | NS                  | NS             | 2.24                               | up         | MIMAT0000064                |
| hsa-let-7a-5p   | NS                  | NS             | 2.20                               | up         | MIMAT0000062                |
| hsa-let-7d-5p   | NS                  | NS             | 2.17                               | up         | MIMAT0000065                |
| hsa-miR-27a-3p  | NS                  | NS             | 2.14                               | up         | MIMAT0000084                |
| hsa-miR-21-5p   | NS                  | NS             | 2.11                               | up         | MIMAT0000076                |
| hsa-miR-215-5p  | NS                  | NS             | 2.08                               | up         | MIMAT0000272                |
| hsa-miR-20a-5p  | NS                  | NS             | 2.07                               | up         | MIMAT0000075                |
| hsa-let-7i-5p   | NS                  | NS             | 2.07                               | up         | MIMAT0000415                |
| hsa-miR-194-5p  | NS                  | NS             | 2.03                               | up         | MIMAT0000460                |
| hsa-miR-29c-3p  | NS                  | NS             | 2.03                               | up         | MIMAT0000681                |
| hsa-miR-203a-3p | NS                  | NS             | 2.02                               | up         | MIMAT0000264                |
| hsa-miR-5001-5p | NS                  | NS             | -2.02                              | down       | MIMAT0021021                |
| hsa-miR-765     | NS                  | NS             | -2.10                              | down       | MIMAT0003945                |
| hsa-miR-4446-3p | NS                  | NS             | -2.15                              | down       | MIMAT0018965                |
| hsa-miR-619-5p  | NS                  | NS             | -2.19                              | down       | MIMAT0026622                |
| hsa-miR-6858-5p | NS                  | NS             | -2.35                              | down       | MIMAT0027616                |
| hsa-miR-3620-5p | 2.92E-10            | 7.17E-13       | -28.52                             | down*      | MIMAT0022967                |

NS = not significant

\* miRNAs not detected in HCT8 NC tumor samples

**Supplementary Table S3: Differentially expressed miRNA ( $|FC| \geq 2$ ) between HCT8 NC and HCT8 CTRL plasma samples**

| miRNA name      | adj. <i>p</i> value | <i>p</i> value | Fold change<br>(HCT8 NC/HCT8 CTRL) | Regulation | miRBase accession<br>number |
|-----------------|---------------------|----------------|------------------------------------|------------|-----------------------------|
| hsa-miR-6884-3p | NS                  | NS             | 2.17                               | up         | MIMAT0027669                |
| hsa-miR-494-3p  | NS                  | NS             | -2.01                              | down       | MIMAT0002816                |
| hsa-miR-122-5p  | NS                  | NS             | -2.01                              | down       | MIMAT0000421                |
| hsa-miR-3680-3p | 8.91E-07            | 1.55E-09       | -20.57                             | down*      | MIMAT0018107                |

NS = not significant

\* miRNAs not detected in HCT8 NC tumor samples

**Supplementary Table S4: Experimentally validated targets (N = 57) of hsa-miR-3620-p5 according to TarBase v8 and miRTarBase v8 databases**

| Gene symbol | Entrez    | Validation method | Pubmed ID         |
|-------------|-----------|-------------------|-------------------|
| ABCG8       | 64241     | PAR-CLIP          | 27292025          |
| ADGRL1      | 22859     | PAR-CLIP          | 26701625          |
| AKT1S1      | 84335     | PAR-CLIP          | 26701625          |
| B4GALT7     | 11285     | HITS-CLIP         | 23313552          |
| BARX2       | 8538      | PAR-CLIP          | 26701625          |
| CCNF        | 899       | PAR-CLIP          | 23592263          |
| CLDN4       | 1364      | PAR-CLIP          | 26701625          |
| COL1A1      | 1277      | PAR-CLIP          | 26701625          |
| COX6B1      | 1340      | HITS-CLIP         | 23313552          |
| DAO         | 1610      | HITS-CLIP         | 19536157          |
| DMRT2       | 10655     | PAR-CLIP          | 20371350          |
| DRAXIN      | 374946    | HITS-CLIP         | 23824327          |
| ELK1        | 2002      | HITS-CLIP         | 23824327          |
| FADS6       | 283985    | PAR-CLIP          | 22012620          |
| FBXW8       | 26259     | PAR-CLIP          | 26701625          |
| FGF19       | 9965      | PAR-CLIP          | 26701625          |
| GDE1        | 51573     | HITS-CLIP         | 23824327          |
| GPX1        | 2876      | PAR-CLIP          | 23446348 20371350 |
| HIST1H1E    | 3008      | PAR-CLIP          | 23446348          |
| HLA-B       | 3106      | HITS-CLIP         | 19536157          |
| CHST3       | 9469      | HITS-CLIP         | 23824327          |
| INAFM1      | 255783    | PAR-CLIP          | 26701625          |
| IPCEF1      | 26034     | HITS-CLIP         | 23824327          |
| KBTBD12     | 166348    | PAR-CLIP          | 23592263 27292025 |
| LAX1        | 54900     | HITS-CLIP         | 23824327          |
| MAP1S       | 55201     | PAR-CLIP          | 26701625          |
| MED28       | 80306     | HITS-CLIP         | 23824327          |
| NPTX1       | 4884      | HITS-CLIP         | 23824327          |
| ORC6        | 23594     | PAR-CLIP          | 27292025          |
| PHF19       | 26147     | PAR-CLIP          | 23592263          |
| PKM         | 5315      | PAR-CLIP          | 26701625          |
| PLXND1      | 23129     | PAR-CLIP          | 23592263          |
| PNRC2       | 55629     | PAR-CLIP          | 21572407          |
| POM121C     | 100101267 | PAR-CLIP          | 23592263          |
| POU2F3      | 25833     | HITS-CLIP         | 23824327 23313552 |
| PPM1N       | 147699    | HITS-CLIP         | 23824327          |
| RAD54L2     | 23132     | HITS-CLIP         | 23824327 23313552 |
| RNF4        | 6047      | PAR-CLIP          | 20371350 26701625 |
| SKI         | 6497      | PAR-CLIP          | 27292025          |
| SLC12A7     | 10723     | PAR-CLIP          | 27292025          |
| SLC2A8      | 29988     | HITS-CLIP         | 19536157          |
| SLC35C2     | 51006     | PAR-CLIP          | 23592263          |
| SLC39A11    | 201266    | HITS-CLIP         | 19536157          |
| SLC6A8      | 6535      | HITS-CLIP         | 23824327          |

|         |        |           |                   |
|---------|--------|-----------|-------------------|
| SLC7A1  | 6541   | PAR-CLIP  | 26701625          |
| SPA17   | 53340  | HITS-CLIP | 19536157          |
| SPTBN2  | 6712   | PAR-CLIP  | 23446348 21572407 |
| TAF8    | 129685 | PAR-CLIP  | 20371350          |
| TIAL1   | 7073   | HITS-CLIP | 23824327          |
| TIMM8B  | 26521  | PAR-CLIP  | 22100165          |
| TMEM91  | 641649 | PAR-CLIP  | 23592263          |
| TRIM28  | 10155  | PAR-CLIP  | 26701625          |
| TUBB2A  | 7280   | PAR-CLIP  | 20371350          |
| UBALD2  | 283991 | PAR-CLIP  | 27292025          |
| WARS    | 7453   | HITS-CLIP | 23313552          |
| ZMAT1   | 84460  | HITS-CLIP | 23824327          |
| ZSCAN25 | 221785 | HITS-CLIP | 19536157          |

**Supplementary Table S5: Experimentally validated targets (N = 178) of hsa-miR-3680-3p according to TarBase v8 and miRTarBase v8 databases**

| Gene symbol | Entrez ID | Validation method   | Pubmed ID                                                                        |
|-------------|-----------|---------------------|----------------------------------------------------------------------------------|
| AAGAB       | 79719     | HITS-CLIP           | 23824327                                                                         |
| ABCC12      | 94160     | HITS-CLIP           | 23824327                                                                         |
| ACER3       | 55331     | HITS-CLIP           | 27418678                                                                         |
| ACSL4       | 2182      | HITS-CLIP//PAR-CLIP | 21572407                                                                         |
| ACSS3       | 79611     | PAR-CLIP            | 22012620                                                                         |
| ACTB        | 60        | PAR-CLIP            | 20371350                                                                         |
| ACVR1B      | 91        | PAR-CLIP            | 23446348 26701625                                                                |
| ADAM19      | 8728      | HITS-CLIP           | 23824327                                                                         |
| AGO2        | 27161     | PAR-CLIP            | 22012620 21572407                                                                |
| AKAP10      | 11216     | PAR-CLIP            | 20371350                                                                         |
| AKR7A2      | 8574      | PAR-CLIP            | 20371350                                                                         |
| ALDH6A1     | 4329      | HITS-CLIP           | 23313552                                                                         |
| ALKBH5      | 54890     | PAR-CLIP            | 20371350                                                                         |
| ANKEF1      | 63926     | HITS-CLIP//PAR-CLIP | 23592263 24398324 23446348 22012620 21572407 20371350 23706177 23313552 27292025 |
| ARHGAP1     | 392       | HITS-CLIP           | 23824327                                                                         |
| ARHGAP31    | 57514     | HITS-CLIP           | 23824327                                                                         |
| ARHGEF3     | 50650     | PAR-CLIP            | 22291592                                                                         |
| ARID1A      | 8289      | PAR-CLIP            | 20371350                                                                         |
| AUTS8       | 282553    | HITS-CLIP           | 23824327                                                                         |
| AZF1        | 560       | PAR-CLIP            | 22012620 20371350                                                                |
| BACH1       | 571       | HITS-CLIP//PAR-CLIP | 20371350 23824327                                                                |
| BCL7A       | 605       | PAR-CLIP            | 20371350                                                                         |
| BID         | 637       | HITS-CLIP           | 23824327                                                                         |
| BOD1        | 91272     | HITS-CLIP           | 23824327 27418678 28735896                                                       |
| BRD4        | 23476     | HITS-CLIP           | 23824327                                                                         |
| BUB1        | 699       | PAR-CLIP            | 22012620                                                                         |
| C4orf26     | 152816    | HITS-CLIP           | 19536157                                                                         |
| CALM1       | 801       | PAR-CLIP            | 23446348 21572407 20371350                                                       |

|                 |        |                     |                                     |
|-----------------|--------|---------------------|-------------------------------------|
| <b>CALM2</b>    | 805    | HITS-CLIP//PAR-CLIP | 23592263 23446348 20371350 21572407 |
| <b>CASP3</b>    | 836    | PAR-CLIP            | 23592263                            |
| <b>CBX4</b>     | 8535   | HITS-CLIP           | 23824327 27418678                   |
| <b>CCDC39</b>   | 339829 | HITS-CLIP           | 23824327                            |
| <b>CCNT2</b>    | 905    | PAR-CLIP            | 24398324                            |
| <b>CDC42EP3</b> | 10602  | HITS-CLIP           | 27418678                            |
| <b>CDH6</b>     | 1004   | HITS-CLIP           | 23824327 27418678                   |
| <b>CENPK</b>    | 64105  | HITS-CLIP           | 23313552                            |
| <b>CERK</b>     | 64781  | HITS-CLIP           | 23313552                            |
| <b>CFAP20</b>   | 29105  | HITS-CLIP           | 28735896                            |
| <b>CLOCK</b>    | 9575   | HITS-CLIP           | 23824327                            |
| <b>CNBP</b>     | 7555   | PAR-CLIP            | 22012620                            |
| <b>COL9A2</b>   | 1298   | HITS-CLIP           | 23824327                            |
| <b>COLEC10</b>  | 10584  | PAR-CLIP            | 21572407                            |
| <b>CRIP1</b>    | 9419   | HITS-CLIP           | 23824327                            |
| <b>CRK</b>      | 1398   | PAR-CLIP            | 27292025                            |
| <b>CTNS</b>     | 1497   | HITS-CLIP           | 23824327                            |
| <b>DNAJC15</b>  | 29103  | HITS-CLIP           | 23313552 27418678                   |
| <b>DR1</b>      | 1810   | HITS-CLIP           | 28735896                            |
| <b>DUSP14</b>   | 11072  | PAR-CLIP            | 21572407                            |
| <b>DUSP8</b>    | 1850   | PAR-CLIP            | 21572407                            |
| <b>DYM</b>      | 54808  | HITS-CLIP           | 23824327                            |
| <b>EDN1</b>     | 1906   | HITS-CLIP           | 23824327                            |
| <b>EI24</b>     | 9538   | HITS-CLIP           | 23824327 27418678                   |
| <b>EOGT</b>     | 285203 | HITS-CLIP           | 27418678                            |
| <b>ETS1</b>     | 2113   | HITS-CLIP           | 23313552                            |
| <b>FAM210B</b>  | 116151 | HITS-CLIP           | 27418678                            |
| <b>FAM46C</b>   | 54855  | PAR-CLIP            | 21572407                            |
| <b>FAM9C</b>    | 171484 | HITS-CLIP           | 23824327                            |
| <b>FER</b>      | 2241   | HITS-CLIP           | 23824327                            |
| <b>FNIP2</b>    | 57600  | HITS-CLIP           | 23824327                            |
| <b>FOXP2</b>    | 93986  | HITS-CLIP           | 27418678                            |
| <b>FRK</b>      | 2444   | PAR-CLIP            | 24398324                            |
| <b>FST</b>      | 10468  | HITS-CLIP           | 27418678                            |
| <b>GABBR2</b>   | 9568   | HITS-CLIP           | 23824327 27418678                   |
| <b>GDNF</b>     | 2668   | PAR-CLIP            | 21572407 20371350                   |
| <b>GLCCI1</b>   | 113263 | HITS-CLIP           | 27418678                            |
| <b>GM2A</b>     | 2760   | PAR-CLIP            | 22100165                            |
| <b>GOLPH3</b>   | 64083  | HITS-CLIP           | 19536157                            |
| <b>GPATCH8</b>  | 23131  | HITS-CLIP           | 23824327                            |
| <b>GPC4</b>     | 2239   | PAR-CLIP            | 21572407 20371350                   |
| <b>GTF2H1</b>   | 2965   | HITS-CLIP           | 23824327                            |
| <b>GUCD1</b>    | 83606  | PAR-CLIP            | 23446348 20371350                   |
| <b>HBS1L</b>    | 10767  | HITS-CLIP           | 23824327 27418678                   |
| <b>HEG1</b>     | 57493  | HITS-CLIP           | 27418678                            |
| <b>HMGB1</b>    | 3146   | HITS-CLIP           | 23824327                            |
| <b>HMGXB4</b>   | 10042  | PAR-CLIP            | 21572407                            |
| <b>HNRNPA3</b>  | 220988 | HITS-CLIP           | 19536157                            |
| <b>HNRNPF</b>   | 3185   | PAR-CLIP            | 24398324 26701625 27292025          |

|          |           |                     |                                              |
|----------|-----------|---------------------|----------------------------------------------|
| HSD17B12 | 51144     | HITS-CLIP           | 23824327                                     |
| CHIC1    | 53344     | PAR-CLIP            | 21572407                                     |
| IMP4     | 92856     | HITS-CLIP           | 19536157                                     |
| JCAD     | 57608     | HITS-CLIP           | 23824327                                     |
| KANK4    | 163782    | HITS-CLIP           | 23824327                                     |
| KCNIP3   | 30818     | HITS-CLIP           | 23824327                                     |
| KCNJ6    | 3763      | HITS-CLIP           | 23824327                                     |
| KCTD16   | 57528     | HITS-CLIP           | 27418678                                     |
| KIAA0408 | 9729      | PAR-CLIP            | 21572407                                     |
| KLF7     | 8609      | HITS-CLIP           | 23824327                                     |
| LIMS1    | 3987      | PAR-CLIP            | 20371350                                     |
| LRRC40   | 55631     | HITS-CLIP           | 23824327                                     |
| LRRC55   | 219527    | HITS-CLIP//PAR-CLIP | 23446348 21572407 20371350 23706177 27292025 |
| MACC1    | 346389    | HITS-CLIP           | 23824327 23313552                            |
| MAGEA3   | 4102      | PAR-CLIP            | 27292025                                     |
| MAGEA6   | 4105      | PAR-CLIP            | 27292025                                     |
| MAPK8    | 5599      | PAR-CLIP            | 24398324 22012620                            |
| MED24    | 9862      | HITS-CLIP           | 23824327 22927820                            |
| MLLT6    | 4302      | HITS-CLIP           | 23824327                                     |
| MMAB     | 326625    | HITS-CLIP           | 23824327                                     |
| MRPS10   | 55173     | HITS-CLIP           | 21572407                                     |
| MTRNR2L6 | 100463482 | PAR-CLIP            | 23446348                                     |
| MYO10    | 4651      | PAR-CLIP            | 22012620 21572407                            |
| NRARP    | 441478    | PAR-CLIP            | 20371350                                     |
| NWD1     | 284434    | PAR-CLIP            | 21572407                                     |
| ONECUT3  | 390874    | HITS-CLIP           | 23824327                                     |
| P2RY1    | 5028      | HITS-CLIP           | 23824327 23313552                            |
| PARP15   | 165631    | HITS-CLIP//PAR-CLIP | 24398324 23313552                            |
| PDE3A    | 5139      | PAR-CLIP            | 22100165                                     |
| PEX26    | 55670     | HITS-CLIP           | 23824327                                     |
| PHIP     | 55023     | HITS-CLIP           | 27418678                                     |
| PITPNC1  | 26207     | PAR-CLIP            | 21572407                                     |
| PLIN1    | 5346      | HITS-CLIP           | 23824327                                     |
| POGK     | 57645     | PAR-CLIP            | 20371350                                     |
| POTED    | 317754    | HITS-CLIP           | 23824327 27418678 28735896                   |
| PRRC2B   | 84726     | HITS-CLIP           | 23824327                                     |
| PTCD2    | 79810     | HITS-CLIP           | 23824327                                     |
| PTPRM    | 5797      | HITS-CLIP           | 23824327                                     |
| PURB     | 5814      | PAR-CLIP            | 23592263                                     |
| RAB10    | 10890     | PAR-CLIP            | 21572407 20371350 26701625                   |
| RAET1E   | 135250    | HITS-CLIP           | 23824327                                     |
| RBBP9    | 10741     | PAR-CLIP            | 23446348                                     |
| RBM47    | 54502     | HITS-CLIP           | 23824327                                     |
| RBPJ     | 3516      | PAR-CLIP            | 26701625                                     |
| RDH13    | 112724    | PAR-CLIP            | 22012620                                     |
| REEP1    | 65055     | HITS-CLIP           | 23824327 27418678                            |
| REL      | 5966      | HITS-CLIP           | 23824327                                     |
| RLIM     | 51132     | PAR-CLIP            | 21572407                                     |

|          |        |                     |                                              |
|----------|--------|---------------------|----------------------------------------------|
| RPL30    | 6156   | PAR-CLIP            | 23592263                                     |
| RPLP0    | 6175   | PAR-CLIP            | 20371350                                     |
| RPS6KA5  | 9252   | HITS-CLIP           | 27418678                                     |
| RRP7A    | 27341  | PAR-CLIP            | 20371350                                     |
| RYBP     | 23429  | HITS-CLIP           | 23824327                                     |
| SATB1    | 6304   | PAR-CLIP            | 23446348 21572407                            |
| SBNO1    | 55206  | HITS-CLIP           | 23824327                                     |
| SCML2    | 10389  | HITS-CLIP           | 23824327                                     |
| SEMA6A   | 57556  | PAR-CLIP            | 23592263                                     |
| SEPT8    | 23176  | PAR-CLIP            | 23592263                                     |
| SESN3    | 143686 | PAR-CLIP            | 20371350                                     |
| SF3A1    | 10291  | HITS-CLIP           | 23824327                                     |
| SKI      | 6497   | PAR-CLIP            | 20371350                                     |
| SKIL     | 6498   | PAR-CLIP            | 22012620                                     |
| SLBP     | 7884   | PAR-CLIP            | 21572407                                     |
| SLC16A1  | 6566   | PAR-CLIP            | 23592263 21572407                            |
| SLC30A10 | 55532  | HITS-CLIP           | 23824327                                     |
| SLC43A2  | 124935 | HITS-CLIP           | 23824327                                     |
| SLC7A2   | 6542   | HITS-CLIP           | 23824327                                     |
| SMU1     | 55234  | HITS-CLIP//PAR-CLIP | 22012620 21572407 23706177 26701625 27292025 |
| SNED1    | 25992  | HITS-CLIP           | 19536157                                     |
| SNTB2    | 6645   | PAR-CLIP            | 22012620 21572407                            |
| SPIN4    | 139886 | HITS-CLIP           | 23313552                                     |
| SPRY1    | 10252  | HITS-CLIP//PAR-CLIP | 21572407                                     |
| ST8SIA3  | 51046  | HITS-CLIP           | 23824327                                     |
| STARD3NL | 83930  | HITS-CLIP           | 23824327                                     |
| STRN3    | 29966  | HITS-CLIP//PAR-CLIP | 21572407 20371350 23706177                   |
| TBXA2R   | 6915   | HITS-CLIP           | 23824327                                     |
| TIAM2    | 26230  | HITS-CLIP           | 27418678                                     |
| TMCC1    | 23023  | PAR-CLIP            | 20371350                                     |
| TMEM245  | 23731  | HITS-CLIP           | 27418678                                     |
| TMEM251  | 26175  | HITS-CLIP           | 27418678                                     |
| TMEM59   | 9528   | HITS-CLIP           | 23824327                                     |
| TMEM64   | 169200 | PAR-CLIP            | 23592263                                     |
| UBTF     | 7343   | HITS-CLIP           | 23824327                                     |
| UNC5D    | 137970 | HITS-CLIP           | 23824327                                     |
| USP6NL   | 9712   | PAR-CLIP            | 23446348                                     |
| VCAN     | 1462   | HITS-CLIP           | 27418678                                     |
| WAC      | 51322  | HITS-CLIP           | 27418678                                     |
| WISP1    | 8840   | HITS-CLIP           | 23824327                                     |
| XIAP     | 331    | HITS-CLIP           | 23824327                                     |
| YIPF6    | 286451 | PAR-CLIP            | 22012620                                     |
| ZBTB5    | 9925   | PAR-CLIP            | 22012620                                     |
| ZNF154   | 7710   | HITS-CLIP//PAR-CLIP | 23446348 21572407 20371350                   |
| ZNF208   | 7757   | HITS-CLIP           | 23313552                                     |
| ZNF226   | 7769   | PAR-CLIP            | 23446348 20371350                            |
| ZNF25    | 219749 | HITS-CLIP           | 23824327                                     |
| ZNF410   | 57862  | PAR-CLIP            | 21572407                                     |

|               |        |                     |                                     |
|---------------|--------|---------------------|-------------------------------------|
| <b>ZNF525</b> | 170958 | PAR-CLIP            | 22100165                            |
| <b>ZNF701</b> | 55762  | PAR-CLIP            | 22100165                            |
| <b>ZNF703</b> | 80139  | PAR-CLIP            | 23446348 20371350                   |
| <b>ZNF813</b> | 126017 | PAR-CLIP            | 20371350                            |
| <b>ZNRF2</b>  | 223082 | HITS-CLIP//PAR-CLIP | 23446348 21572407 20371350 27292025 |

**Supplementary Table S6: Differentially expressed miRNA ( $|FC| \geq 2$ , adj.  $p < 0.05$ ) between colon cancer primocultures T47B and T48B**

| miRNA name             | adj. $p$ value | $p$ value | Regulation | Fold change T47B/T48B | miRBase accession number |
|------------------------|----------------|-----------|------------|-----------------------|--------------------------|
| <b>hsa-miR-3135b</b>   | 1.65E-04       | 2.61E-05  | up         | 269.23*               | MIMAT0018985             |
| <b>hsa-miR-3654</b>    | 3.08E-04       | 5.20E-05  | up         | 160.63*               | MIMAT0018074             |
| <b>hsa-miR-4499</b>    | 4.07E-06       | 2.10E-08  | up         | 151.57*               | MIMAT0019035             |
| <b>hsa-miR-6887-5p</b> | 2.74E-04       | 4.43E-05  | up         | 145.95*               | MIMAT0027674             |
| <b>hsa-miR-218-5p</b>  | 3.06E-05       | 3.11E-06  | up         | 134.56*               | MIMAT0000275             |
| <b>hsa-miR-4800-5p</b> | 1.21E-05       | 7.67E-07  | up         | 114.62*               | MIMAT0019978             |
| <b>hsa-miR-134-5p</b>  | 7.28E-05       | 9.57E-06  | up         | 114.55*               | MIMAT0000447             |
| <b>hsa-miR-4478</b>    | 4.64E-05       | 5.06E-06  | up         | 113.68*               | MIMAT0019006             |
| <b>hsa-miR-1181</b>    | 1.21E-05       | 7.97E-07  | up         | 109.64*               | MIMAT0005826             |
| <b>hsa-miR-6833-5p</b> | 1.53E-04       | 2.29E-05  | up         | 105.35*               | MIMAT0027566             |
| <b>hsa-miR-3141</b>    | 6.64E-05       | 8.37E-06  | up         | 100.14*               | MIMAT0015010             |
| <b>hsa-miR-7847-3p</b> | 2.98E-05       | 2.81E-06  | up         | 96.58*                | MIMAT0030422             |
| <b>hsa-miR-3663-3p</b> | 2.98E-05       | 2.40E-06  | up         | 90.73*                | MIMAT0018085             |
| <b>hsa-miR-142-5p</b>  | 6.64E-05       | 8.08E-06  | up         | 88.70*                | MIMAT0000433             |
| <b>hsa-miR-135a-3p</b> | 1.09E-03       | 2.86E-04  | up         | 87.60*                | MIMAT0004595             |
| <b>hsa-miR-4291</b>    | 1.14E-05       | 5.99E-07  | up         | 84.91*                | MIMAT0016922             |
| <b>hsa-miR-6867-5p</b> | 5.35E-05       | 6.03E-06  | up         | 82.32*                | MIMAT0027634             |
| <b>hsa-miR-6850-5p</b> | 4.31E-06       | 7.99E-08  | up         | 80.10*                | MIMAT0027600             |
| <b>hsa-miR-6812-5p</b> | 2.98E-05       | 2.84E-06  | up         | 78.45*                | MIMAT0027524             |
| <b>hsa-miR-6752-5p</b> | 2.98E-05       | 2.53E-06  | up         | 71.23*                | MIMAT0027404             |
| <b>hsa-miR-7108-5p</b> | 4.07E-06       | 4.43E-08  | up         | 65.75*                | MIMAT0028113             |
| <b>hsa-miR-4298</b>    | 4.07E-06       | 4.59E-08  | up         | 65.22*                | MIMAT0016852             |
| <b>hsa-miR-6791-5p</b> | 2.45E-03       | 8.00E-04  | up         | 36.52*                | MIMAT0027482             |
| <b>hsa-miR-3652</b>    | 4.56E-06       | 1.85E-07  | up         | 23.16*                | MIMAT0018072             |
| <b>hsa-miR-8060</b>    | 4.56E-06       | 1.89E-07  | up         | 22.80*                | MIMAT0030987             |
| <b>hsa-miR-6756-5p</b> | 4.85E-06       | 2.19E-07  | up         | 22.32*                | MIMAT0027412             |
| <b>hsa-miR-4778-5p</b> | 1.21E-05       | 7.36E-07  | up         | 22.22*                | MIMAT0019936             |
| <b>hsa-miR-6840-3p</b> | 3.08E-04       | 5.29E-05  | up         | 21.32*                | MIMAT0027583             |
| <b>hsa-miR-1249-3p</b> | 8.27E-05       | 1.15E-05  | up         | 21.13*                | MIMAT0005901             |
| <b>hsa-miR-7107-5p</b> | 3.08E-03       | 1.11E-03  | up         | 4.95                  | MIMAT0028111             |
| <b>hsa-miR-6723-5p</b> | 7.23E-03       | 3.39E-03  | up         | 4.13                  | MIMAT0025855             |
| <b>hsa-miR-4485-3p</b> | 9.37E-04       | 2.25E-04  | up         | 4.04                  | MIMAT0019019             |

|                         |          |          |      |       |              |
|-------------------------|----------|----------|------|-------|--------------|
| <b>hsa-miR-6724-5p</b>  | 4.89E-03 | 2.02E-03 | up   | 3.59  | MIMAT0025856 |
| <b>hsa-miR-424-5p</b>   | 4.41E-02 | 3.12E-02 | up   | 3.39  | MIMAT0001341 |
| <b>hsa-miR-5787</b>     | 1.81E-02 | 1.09E-02 | up   | 3.27  | MIMAT0023252 |
| <b>hsa-miR-4281</b>     | 1.03E-03 | 2.63E-04 | up   | 3.19  | MIMAT0016907 |
| <b>hsa-miR-4459</b>     | 6.93E-03 | 3.18E-03 | up   | 3.17  | MIMAT0018981 |
| <b>hsa-miR-4516</b>     | 1.68E-03 | 4.80E-04 | up   | 2.95  | MIMAT0019053 |
| <b>hsa-miR-188-5p</b>   | 9.25E-04 | 2.18E-04 | up   | 2.82  | MIMAT0000457 |
| <b>hsa-miR-1973</b>     | 4.86E-04 | 9.50E-05 | up   | 2.76  | MIMAT0009448 |
| <b>hsa-miR-8069</b>     | 1.60E-04 | 2.47E-05 | up   | 2.62  | MIMAT0030996 |
| <b>hsa-miR-7110-5p</b>  | 3.04E-03 | 1.06E-03 | up   | 2.57  | MIMAT0028117 |
| <b>hsa-miR-6869-5p</b>  | 3.61E-03 | 1.44E-03 | up   | 2.53  | MIMAT0027638 |
| <b>hsa-miR-1225-5p</b>  | 9.69E-04 | 2.40E-04 | up   | 2.53  | MIMAT0005572 |
| <b>hsa-miR-7150</b>     | 9.75E-03 | 5.13E-03 | up   | 2.52  | MIMAT0028211 |
| <b>hsa-miR-125b-5p</b>  | 2.96E-03 | 1.02E-03 | up   | 2.52  | MIMAT0000423 |
| <b>hsa-miR-6769b-5p</b> | 1.39E-02 | 8.07E-03 | up   | 2.48  | MIMAT0027620 |
| <b>hsa-miR-22-3p</b>    | 2.22E-03 | 7.00E-04 | up   | 2.42  | MIMAT0000077 |
| <b>hsa-miR-642a-3p</b>  | 2.22E-03 | 7.02E-04 | up   | 2.42  | MIMAT0020924 |
| <b>hsa-miR-6891-5p</b>  | 3.72E-02 | 2.56E-02 | up   | 2.33  | MIMAT0027682 |
| <b>hsa-miR-8063</b>     | 3.82E-02 | 2.65E-02 | up   | 2.29  | MIMAT0030990 |
| <b>hsa-miR-1207-5p</b>  | 3.54E-03 | 1.39E-03 | up   | 2.28  | MIMAT0005871 |
| <b>hsa-miR-6821-5p</b>  | 8.74E-03 | 4.37E-03 | up   | 2.27  | MIMAT0027542 |
| <b>hsa-miR-24-3p</b>    | 3.54E-03 | 1.38E-03 | up   | 2.24  | MIMAT0000080 |
| <b>hsa-miR-1587</b>     | 3.56E-03 | 1.40E-03 | up   | 2.13  | MIMAT0019077 |
| <b>hsa-miR-642b-3p</b>  | 5.68E-03 | 2.44E-03 | up   | 2.11  | MIMAT0018444 |
| <b>hsa-miR-1275</b>     | 1.32E-04 | 1.93E-05 | up   | 2.11  | MIMAT0005929 |
| <b>hsa-miR-6090</b>     | 2.06E-02 | 1.25E-02 | up   | 2.10  | MIMAT0023715 |
| <b>hsa-miR-142-3p</b>   | 9.08E-03 | 4.61E-03 | up   | 2.10  | MIMAT0000434 |
| <b>hsa-miR-4687-3p</b>  | 5.91E-03 | 2.58E-03 | up   | 2.08  | MIMAT0019775 |
| <b>hsa-miR-6088</b>     | 5.22E-03 | 2.18E-03 | up   | 2.02  | MIMAT0023713 |
| <b>hsa-miR-197-5p</b>   | 1.39E-02 | 8.00E-03 | down | -2.02 | MIMAT0022691 |
| <b>hsa-miR-6131</b>     | 9.25E-04 | 2.19E-04 | down | -2.04 | MIMAT0024615 |
| <b>hsa-miR-200a-3p</b>  | 5.76E-04 | 1.17E-04 | down | -2.09 | MIMAT0000682 |
| <b>hsa-miR-125a-5p</b>  | 2.22E-03 | 6.94E-04 | down | -2.10 | MIMAT0000443 |
| <b>hsa-miR-148a-3p</b>  | 6.23E-03 | 2.74E-03 | down | -2.11 | MIMAT0000243 |
| <b>hsa-miR-374a-5p</b>  | 1.41E-02 | 8.29E-03 | down | -2.13 | MIMAT0000727 |
| <b>hsa-miR-5581-5p</b>  | 1.14E-03 | 3.09E-04 | down | -2.17 | MIMAT0022275 |
| <b>hsa-miR-4716-3p</b>  | 2.52E-03 | 8.34E-04 | down | -2.18 | MIMAT0019827 |
| <b>hsa-miR-4728-5p</b>  | 9.63E-04 | 2.35E-04 | down | -2.24 | MIMAT0019849 |
| <b>hsa-miR-1273g-3p</b> | 5.42E-03 | 2.28E-03 | down | -2.28 | MIMAT0022742 |
| <b>hsa-miR-331-3p</b>   | 1.03E-03 | 2.61E-04 | down | -2.29 | MIMAT0000760 |
| <b>hsa-miR-5088-5p</b>  | 5.68E-03 | 2.46E-03 | down | -2.34 | MIMAT0021080 |
| <b>hsa-miR-3125</b>     | 3.54E-03 | 1.33E-03 | down | -2.39 | MIMAT0014988 |
| <b>hsa-miR-30c-5p</b>   | 8.64E-04 | 1.98E-04 | down | -2.42 | MIMAT0000244 |



|                 |          |          |      |           |              |
|-----------------|----------|----------|------|-----------|--------------|
| hsa-miR-130b-3p | 2.12E-03 | 6.38E-04 | down | -2.68     | MIMAT0000691 |
| hsa-miR-19a-3p  | 1.75E-03 | 5.08E-04 | down | -2.68     | MIMAT0000073 |
| hsa-let-7a-5p   | 2.40E-02 | 1.52E-02 | down | -2.76     | MIMAT0000062 |
| hsa-miR-324-5p  | 5.30E-04 | 1.06E-04 | down | -3.23     | MIMAT0000761 |
| hsa-miR-4746-3p | 6.35E-04 | 1.36E-04 | down | -3.29     | MIMAT0019881 |
| hsa-let-7e-5p   | 1.82E-03 | 5.41E-04 | down | -3.41     | MIMAT0000066 |
| hsa-miR-20a-5p  | 3.46E-04 | 6.38E-05 | down | -3.70     | MIMAT0000075 |
| hsa-miR-203a-3p | 2.41E-03 | 7.71E-04 | down | -4.16     | MIMAT0000264 |
| hsa-miR-17-5p   | 2.36E-05 | 1.77E-06 | down | -4.33     | MIMAT0000070 |
| hsa-miR-1914-3p | 3.19E-04 | 5.64E-05 | down | -4.73     | MIMAT0007890 |
| hsa-miR-20b-5p  | 3.04E-03 | 1.07E-03 | down | -4.85     | MIMAT0001413 |
| hsa-miR-4497    | 3.52E-04 | 6.68E-05 | down | -7.59     | MIMAT0019032 |
| hsa-miR-4299    | 3.08E-04 | 5.32E-05 | down | -7.72     | MIMAT0016851 |
| hsa-miR-301a-3p | 7.16E-04 | 1.59E-04 | down | -14.23    | MIMAT0000688 |
| hsa-miR-338-5p  | 8.59E-03 | 4.26E-03 | down | -24.07    | MIMAT0004701 |
| hsa-miR-221-3p  | 1.07E-04 | 1.53E-05 | down | -24.79    | MIMAT0000278 |
| hsa-miR-146b-5p | 5.88E-05 | 6.85E-06 | down | -27.89    | MIMAT0002809 |
| hsa-miR-30e-3p  | 3.54E-03 | 1.36E-03 | down | -41.88*   | MIMAT0000693 |
| hsa-miR-151a-5p | 2.98E-05 | 2.92E-06 | down | -45.51*   | MIMAT0004697 |
| hsa-miR-148b-3p | 2.69E-03 | 9.09E-04 | down | -56.57*   | MIMAT0000759 |
| hsa-miR-590-5p  | 2.59E-03 | 8.66E-04 | down | -58.94*   | MIMAT0003258 |
| hsa-miR-532-3p  | 3.52E-04 | 6.75E-05 | down | -73.29*   | MIMAT0004780 |
| hsa-miR-18b-5p  | 4.56E-06 | 1.79E-07 | down | -79.16*   | MIMAT0001412 |
| hsa-miR-362-3p  | 4.31E-06 | 1.30E-07 | down | -79.51*   | MIMAT0004683 |
| hsa-miR-33a-5p  | 7.76E-05 | 1.05E-05 | down | -81.28*   | MIMAT0000091 |
| hsa-miR-185-5p  | 1.21E-05 | 8.20E-07 | down | -89.77*   | MIMAT0000455 |
| hsa-miR-151a-3p | 2.98E-05 | 2.92E-06 | down | -97.29*   | MIMAT0000757 |
| hsa-miR-362-5p  | 3.25E-05 | 3.42E-06 | down | -103.52*  | MIMAT0000705 |
| hsa-miR-151b    | 4.31E-06 | 8.82E-08 | down | -105.68*  | MIMAT0010214 |
| hsa-miR-194-5p  | 6.64E-05 | 8.49E-06 | down | -170.05*  | MIMAT0000460 |
| hsa-miR-532-5p  | 1.14E-05 | 5.81E-07 | down | -190.43*  | MIMAT0002888 |
| hsa-miR-660-5p  | 4.31E-06 | 1.28E-07 | down | -192.44*  | MIMAT0003338 |
| hsa-miR-18a-5p  | 4.31E-06 | 1.28E-07 | down | -221.76*  | MIMAT0000072 |
| hsa-miR-215-5p  | 1.69E-05 | 1.21E-06 | down | -1029.11* | MIMAT0000272 |

\* miRNAs not detected in T48B or \*\*T47B.

**Supplementary Table S7: Significantly enriched Gene Ontology biological process terms**

| Gene ontology biological process terms            | Number of genes | p value  | adj. p value |
|---------------------------------------------------|-----------------|----------|--------------|
| positive regulation of metabolic process          | 359             | 1.53E-68 | 1.53E-66     |
| cell proliferation                                | 290             | 2.05E-65 | 1.03E-63     |
| positive regulation of cellular metabolic process | 340             | 7.54E-65 | 2.51E-63     |

|                                                                         |     |          |          |
|-------------------------------------------------------------------------|-----|----------|----------|
| regulation of developmental process                                     | 283 | 2.10E-62 | 5.25E-61 |
| regulation of cell proliferation                                        | 242 | 6.23E-62 | 1.25E-60 |
| positive regulation of developmental process                            | 174 | 8.61E-58 | 1.44E-56 |
| regulation of cell differentiation                                      | 222 | 1.89E-57 | 2.70E-56 |
| positive regulation of transcription from RNA polymerase II promoter    | 167 | 5.24E-54 | 6.55E-53 |
| regulation of transcription from RNA polymerase II promoter             | 245 | 1.42E-53 | 1.40E-52 |
| positive regulation of transcription, DNA-dependent                     | 213 | 1.54E-53 | 1.40E-52 |
| positive regulation of cellular process                                 | 213 | 1.54E-53 | 1.40E-52 |
| regulation of multicellular organismal process                          | 472 | 3.96E-53 | 3.30E-52 |
| positive regulation of nucleobase-containing compound metabolic process | 314 | 2.24E-52 | 1.72E-51 |
| positive regulation of RNA metabolic process                            | 232 | 4.67E-52 | 3.34E-51 |
| regulation of programmed cell death                                     | 215 | 2.14E-50 | 1.43E-49 |
| negative regulation of cellular process                                 | 233 | 2.42E-49 | 1.51E-48 |
| positive regulation of cell differentiation                             | 421 | 5.93E-49 | 3.49E-48 |
| regulation of apoptotic process                                         | 133 | 2.93E-48 | 1.63E-47 |
| negative regulation of biological process                               | 229 | 6.15E-48 | 3.24E-47 |
| organ development                                                       | 448 | 3.76E-47 | 1.88E-46 |
| positive regulation of biological process                               | 358 | 6.73E-45 | 3.20E-44 |
| protein phosphorylation                                                 | 495 | 6.95E-44 | 3.16E-43 |
| transcription from RNA polymerase II promoter                           | 216 | 4.82E-43 | 2.10E-42 |
| phosphorylation                                                         | 251 | 5.45E-42 | 2.27E-41 |
| programmed cell death                                                   | 230 | 9.75E-42 | 3.90E-41 |
| apoptotic process                                                       | 267 | 4.83E-41 | 1.86E-40 |
| enzyme linked receptor protein signaling pathway                        | 264 | 1.35E-40 | 4.82E-40 |
| regulation of molecular function                                        | 264 | 1.35E-40 | 4.82E-40 |
| negative regulation of programmed cell death                            | 184 | 1.40E-40 | 4.83E-40 |
| tissue development                                                      | 273 | 1.63E-40 | 5.43E-40 |
| regulation of cellular protein metabolic process                        | 136 | 1.74E-40 | 5.61E-40 |
| negative regulation of apoptotic process                                | 228 | 2.22E-40 | 6.94E-40 |
| regulation of protein metabolic process                                 | 217 | 3.47E-40 | 1.05E-39 |
| regulation of phosphorylation                                           | 133 | 2.52E-39 | 7.20E-39 |
| intracellular protein kinase cascade                                    | 133 | 2.52E-39 | 7.20E-39 |
| positive regulation of signal transduction                              | 237 | 3.94E-39 | 1.09E-38 |
| tube development                                                        | 171 | 7.64E-39 | 2.06E-38 |
| negative regulation of cell proliferation                               | 177 | 1.31E-38 | 3.45E-38 |
| regulation of protein modification process                              | 164 | 1.46E-38 | 3.74E-38 |
| gland development                                                       | 112 | 3.32E-38 | 8.30E-38 |
| negative regulation of metabolic process                                | 121 | 3.65E-38 | 8.90E-38 |
| regulation of protein phosphorylation                                   | 186 | 5.72E-38 | 1.36E-37 |
| response to organic substance                                           | 84  | 2.28E-36 | 5.30E-36 |

|                                                                         |     |          |          |
|-------------------------------------------------------------------------|-----|----------|----------|
| tissue morphogenesis                                                    | 231 | 2.79E-36 | 6.34E-36 |
| anatomical structure formation involved in morphogenesis                | 159 | 3.16E-36 | 7.02E-36 |
| organ morphogenesis                                                     | 282 | 5.75E-36 | 1.25E-35 |
| cell development                                                        | 115 | 1.85E-35 | 3.94E-35 |
| positive regulation of cell proliferation                               | 250 | 2.37E-35 | 4.94E-35 |
| transmembrane receptor protein tyrosine kinase signaling pathway        | 155 | 4.69E-35 | 9.57E-35 |
| response to abiotic stimulus                                            | 230 | 5.88E-35 | 1.18E-34 |
| morphogenesis of an epithelium                                          | 137 | 9.75E-35 | 1.91E-34 |
| regulation of signal transduction                                       | 136 | 2.28E-34 | 4.38E-34 |
| hematopoietic or lymphoid organ development                             | 144 | 1.22E-33 | 2.28E-33 |
| cell migration                                                          | 98  | 1.23E-33 | 2.28E-33 |
| system development                                                      | 272 | 1.26E-33 | 2.29E-33 |
| positive regulation of protein metabolic process                        | 124 | 2.08E-33 | 3.71E-33 |
| hemopoiesis                                                             | 160 | 2.87E-33 | 5.04E-33 |
| growth                                                                  | 437 | 3.49E-33 | 6.02E-33 |
| negative regulation of cellular metabolic process                       | 162 | 6.35E-33 | 1.08E-32 |
| vasculature development                                                 | 119 | 8.27E-33 | 1.38E-32 |
| immune system development                                               | 139 | 8.42E-33 | 1.38E-32 |
| regulation of cellular component organization                           | 211 | 9.49E-33 | 1.53E-32 |
| anatomical structure morphogenesis                                      | 120 | 1.20E-32 | 1.90E-32 |
| regulation of catalytic activity                                        | 127 | 1.54E-32 | 2.41E-32 |
| regulation of cell cycle                                                | 199 | 1.86E-32 | 2.86E-32 |
| positive regulation of response to stimulus                             | 296 | 3.02E-32 | 4.58E-32 |
| response to external stimulus                                           | 215 | 4.53E-32 | 6.76E-32 |
| regulation of cell migration                                            | 142 | 6.29E-32 | 9.25E-32 |
| positive regulation of cell migration                                   | 200 | 8.61E-32 | 1.25E-31 |
| intracellular signal transduction                                       | 196 | 1.47E-31 | 2.10E-31 |
| regulation of kinase activity                                           | 96  | 7.31E-31 | 1.02E-30 |
| response to endogenous stimulus                                         | 72  | 7.36E-31 | 1.02E-30 |
| negative regulation of transcription, DNA-dependent                     | 266 | 1.15E-30 | 1.57E-30 |
| negative regulation of biosynthetic process                             | 126 | 1.16E-30 | 1.57E-30 |
| regulation of transferase activity                                      | 182 | 1.21E-30 | 1.61E-30 |
| regulation of growth                                                    | 148 | 4.71E-30 | 6.12E-30 |
| positive regulation of cellular protein metabolic process               | 148 | 4.71E-30 | 6.12E-30 |
| response to wounding                                                    | 170 | 8.15E-30 | 1.04E-29 |
| negative regulation of cellular biosynthetic process                    | 127 | 8.29E-30 | 1.05E-29 |
| regulation of response to stimulus                                      | 104 | 2.07E-29 | 2.59E-29 |
| epithelial cell differentiation                                         | 145 | 2.28E-29 | 2.81E-29 |
| negative regulation of RNA metabolic process                            | 175 | 2.59E-29 | 3.16E-29 |
| negative regulation of developmental process                            | 167 | 3.58E-29 | 4.31E-29 |
| negative regulation of nucleobase-containing compound metabolic process | 325 | 5.20E-29 | 6.19E-29 |

|                                                     |     |          |          |
|-----------------------------------------------------|-----|----------|----------|
| regulation of gene expression                       | 79  | 1.39E-28 | 1.64E-28 |
| positive regulation of protein modification process | 148 | 2.72E-28 | 3.16E-28 |
| tube morphogenesis                                  | 115 | 3.46E-28 | 3.98E-28 |
| regulation of protein kinase activity               | 157 | 4.32E-28 | 4.91E-28 |
| regulation of cellular metabolic process            | 394 | 6.62E-28 | 7.44E-28 |
| cell surface receptor signaling pathway             | 133 | 6.76E-28 | 7.51E-28 |
| neurogenesis                                        | 79  | 7.44E-28 | 8.18E-28 |
| angiogenesis                                        | 116 | 2.21E-27 | 2.40E-27 |
| positive regulation of phosphate metabolic process  | 489 | 2.49E-27 | 2.68E-27 |
| response to chemical stimulus                       | 319 | 2.53E-27 | 2.69E-27 |
| positive regulation of phosphorylation              | 177 | 3.44E-27 | 3.62E-27 |
| negative regulation of cell differentiation         | 87  | 5.38E-27 | 5.60E-27 |

**Supplementary Table S8: Significantly enriched KEGG pathways**

| Gene ontology biological process terms    | Number of genes | <i>p</i> value | adj. <i>p</i> value |
|-------------------------------------------|-----------------|----------------|---------------------|
| Pathways in cancer                        | 116             | 1.63E-45       | 1.63E-43            |
| Prostate cancer                           | 45              | 1.62E-24       | 8.10E-23            |
| Chronic myeloid leukemia                  | 41              | 2.94E-24       | 9.80E-23            |
| Pancreatic cancer                         | 37              | 4.99E-21       | 1.25E-19            |
| Colorectal cancer                         | 29              | 2.60E-18       | 5.20E-17            |
| HTLV-I infection                          | 60              | 1.14E-17       | 1.90E-16            |
| Melanoma                                  | 33              | 3.95E-17       | 5.64E-16            |
| Bladder cancer                            | 21              | 3.05E-16       | 3.81E-15            |
| Glioma                                    | 31              | 6.95E-16       | 7.72E-15            |
| Focal adhesion                            | 57              | 1.40E-15       | 1.40E-14            |
| Neurotrophin signaling pathway            | 43              | 1.80E-15       | 1.64E-14            |
| ErbB signaling pathway                    | 35              | 6.11E-15       | 5.09E-14            |
| Acute myeloid leukemia                    | 28              | 7.09E-15       | 5.45E-14            |
| TGF-beta signaling pathway                | 34              | 1.22E-14       | 8.71E-14            |
| Non-small cell lung cancer                | 26              | 3.92E-14       | 2.61E-13            |
| Osteoclast differentiation                | 40              | 8.37E-14       | 5.23E-13            |
| MAPK signaling pathway                    | 64              | 1.33E-13       | 7.82E-13            |
| Cell cycle                                | 40              | 3.93E-13       | 2.18E-12            |
| Toxoplasmosis                             | 34              | 4.22E-13       | 2.22E-12            |
| Chagas disease (American trypanosomiasis) | 33              | 5.97E-13       | 2.99E-12            |
| Renal cell carcinoma                      | 26              | 2.72E-12       | 1.30E-11            |
| Measles                                   | 34              | 8.85E-12       | 4.02E-11            |
| p53 signaling pathway                     | 27              | 1.25E-11       | 5.43E-11            |
| Hepatitis C                               | 33              | 2.48E-11       | 1.03E-10            |
| Adherens junction                         | 27              | 2.81E-11       | 1.12E-10            |
| Small cell lung cancer                    | 29              | 3.07E-11       | 1.18E-10            |
| Endometrial cancer                        | 21              | 3.78E-11       | 1.40E-10            |

|                                                            |    |          |          |
|------------------------------------------------------------|----|----------|----------|
| Epstein-Barr virus infection                               | 29 | 1.08E-09 | 3.86E-09 |
| Thyroid cancer                                             | 15 | 3.29E-09 | 1.13E-08 |
| Toll-like receptor signaling pathway                       | 29 | 5.70E-09 | 1.90E-08 |
| Leishmaniasis                                              | 20 | 8.02E-09 | 2.59E-08 |
| Jak-STAT signaling pathway                                 | 29 | 9.59E-09 | 3.00E-08 |
| Influenza A                                                | 30 | 1.64E-08 | 4.97E-08 |
| T cell receptor signaling pathway                          | 28 | 3.19E-08 | 9.38E-08 |
| Wnt signaling pathway                                      | 35 | 5.78E-08 | 1.65E-07 |
| Cytokine-cytokine receptor interaction                     | 50 | 1.18E-07 | 3.28E-07 |
| Regulation of actin cytoskeleton                           | 40 | 1.26E-07 | 3.41E-07 |
| Insulin signaling pathway                                  | 32 | 5.80E-07 | 1.53E-06 |
| B cell receptor signaling pathway                          | 22 | 6.01E-07 | 1.54E-06 |
| mTOR signaling pathway                                     | 16 | 1.25E-06 | 3.13E-06 |
| Dorso-ventral axis formation                               | 8  | 1.89E-06 | 4.61E-06 |
| Tuberculosis                                               | 36 | 2.58E-06 | 6.14E-06 |
| VEGF signaling pathway                                     | 21 | 3.19E-06 | 7.42E-06 |
| Adipocytokine signaling pathway                            | 18 | 9.73E-06 | 0.000022 |
| Fc epsilon RI signaling pathway                            | 20 | 9.9E-06  | 0.000022 |
| GnRH signaling pathway                                     | 23 | 1.03E-05 | 2.24E-05 |
| Pertussis                                                  | 16 | 1.08E-05 | 2.3E-05  |
| Endocytosis                                                | 24 | 1.14E-05 | 2.38E-05 |
| Apoptosis                                                  | 21 | 1.45E-05 | 2.96E-05 |
| Herpes simplex infection                                   | 24 | 1.62E-05 | 3.24E-05 |
| Type II diabetes mellitus                                  | 15 | 1.65E-05 | 3.24E-05 |
| Chemokine signaling pathway                                | 36 | 1.86E-05 | 3.58E-05 |
| Progesterone-mediated oocyte maturation                    | 20 | 0.000028 | 5.28E-05 |
| Axon guidance                                              | 25 | 6.06E-05 | 0.000112 |
| Epithelial cell signaling in Helicobacter pylori infection | 12 | 7.81E-05 | 0.000142 |
| Rheumatoid arthritis                                       | 8  | 0.00016  | 0.000286 |
| Legionellosis                                              | 12 | 0.000182 | 0.000319 |
| Salmonella infection                                       | 17 | 0.000237 | 0.000409 |
| Melanogenesis                                              | 21 | 0.000309 | 0.000524 |
| NOD-like receptor signaling pathway                        | 13 | 0.000382 | 0.000637 |
| Gap junction                                               | 19 | 0.000418 | 0.000685 |
| Fc gamma R-mediated phagocytosis                           | 20 | 0.00048  | 0.000774 |
| Basal cell carcinoma                                       | 12 | 0.000929 | 0.001475 |
| African trypanosomiasis                                    | 8  | 0.00138  | 0.002156 |
| Long-term potentiation                                     | 15 | 0.0016   | 0.002462 |
| Malaria                                                    | 5  | 0.00197  | 0.002985 |
| Cholinergic synapse                                        | 18 | 0.00251  | 0.003746 |
| Aldosterone-regulated sodium reabsorption                  | 9  | 0.00307  | 0.004515 |
| Arrhythmogenic right ventricular cardiomyopathy (ARVC)     | 5  | 0.00312  | 0.004522 |
| Shigellosis                                                | 11 | 0.00319  | 0.004557 |
| Natural killer cell mediated cytotoxicity                  | 23 | 0.00389  | 0.005479 |
| Bacterial invasion of epithelial cells                     | 12 | 0.00459  | 0.006288 |
| Leukocyte transendothelial migration                       | 19 | 0.00459  | 0.006288 |

|                                         |    |         |          |
|-----------------------------------------|----|---------|----------|
| Transcriptional misregulation in cancer | 6  | 0.00598 | 0.008081 |
| Amyotrophic lateral sclerosis (ALS)     | 9  | 0.00817 | 0.010893 |
| Tight junction                          | 19 | 0.012   | 0.015789 |
| Hedgehog signaling pathway              | 11 | 0.0127  | 0.016494 |
| Carbohydrate digestion and absorption   | 5  | 0.0212  | 0.027179 |
| Notch signaling pathway                 | 9  | 0.0271  | 0.034304 |
| Viral myocarditis                       | 6  | 0.0291  | 0.036375 |
| Cytosolic DNA-sensing pathway           | 5  | 0.0328  | 0.040494 |
| RIG-I-like receptor signaling pathway   | 9  | 0.0346  | 0.042195 |
| Prion diseases                          | 5  | 0.0399  | 0.048072 |
| Oocyte meiosis                          | 16 | 0.0406  | 0.048333 |

---
