# Supplementary material for: Role of N-Cadherin in Epithelial-to-Mesenchymal Transition and Chemosensitivity of Colon Carcinoma Cells
Source: Cancers (Basel). 2022 Oct 20;14(20):5146. doi: 10.3390/cancers14205146 (PMC9601123; doi:10.3390/cancers14205146)
Supplement: Supplementary file 1 [file cancers-14-05146-s001.zip]

Archive with 7 entries (7 files):
- Fig 1-S.tif
- Fig 2-S.tif
- Fig 3-S.tif
- Fig 4-S revised.tif
- File S1. WB - original blots with density.pdf
- S1_table_primer sequences.xlsx
- Supplementary material_miRNOM.pdf
