# Supplementary material for: Role of N-Cadherin in Epithelial-to-Mesenchymal Transition and Chemosensitivity of Colon Carcinoma Cells
Source: Cancers (Basel). 2022 Oct 20;14(20):5146. doi: 10.3390/cancers14205146 (PMC9601123; doi:10.3390/cancers14205146)
Supplement: Supplementary file 1 [file cancers-14-05146-s001.zip › S1_table_primer sequences.xlsx]

## Sheet: List1
primer sequence	name of primer
CCCTTGAACTTGTCTTGCGC	h-ZEB1-F
TTATGGGGTTGGCACTTGGT	h-ZEB1-R
CCCCTGCTACTTTCATGCCA	h-ZEB2-F
AGTTGGGTAGGTGTAGGCCA	h-ZEB2-R
ACATCCTGGCTCACACTGAA	rn_B2M_F
ATGTCTCGGTCCCAGGTG	rn_B2M_R
GGAACCAATGAGTCCCTGGA	h_vim_F
GTAGTTAGCAGCTTCAACGGC	h_vim_R
CCCCATACCAGAACCTCGAA	h_Ecadh_f
TCTGCTGTGAAGGGAGATGT	h_Ecadh_r
TACAGGATCATTGGCTACACACC	h_MMP2_f
GGTCACATCGCTCCAGACT	h_MMP2_r
ACCTCGAACTTTGACAGCGAC	h_MMP9_f
CTGAGGAATGATCTAAGCCCAGC	h_MMP9_r
TGACAATGACCCCACAGCTC	h_Ncadh_f
GTCCTGCTCACCACCACTAC	h_Ncadh_r
GAGTCCACTGGCGTCTTCAC	h_GAPDH_F
GAGGCATTGCTGATGATCTTGAG	h_GAPDH_R
GCGTCCTAACACTGTCTGGT	mir200a_F
GGTGCTAATACTGCCTGGTA	miR-200b-F
CTGACTAATACTGCCGGGTA	miR-200c-F
GTCTCCTCTGGTGCAGGGTCCGAGGTATTCGCACCAGAGGAGACACATCG	mir200abc_RT
GGATGACGTAGCTTATCAGACTG	MIR-21_F
GTCTCCTCTGGTGCAGGGTCCGAGGTATTCGCACCAGAGGAGACTCAACA	Mir-21_RT
GTCTCCTCTGGTGCAGGGTCCGAGGTATTCGCACCAGAGGAGACCGCCAA	mir-16-RT
ACAGCCTAGCAGCACGTAAAT	mir-16_F
