# Supplementary figures and images for: Role of N-Cadherin in Epithelial-to-Mesenchymal Transition and Chemosensitivity of Colon Carcinoma Cells
Source: MDPI journal article supplement (doi:10.3390/cancers14205146), 2022-10-20

Western blots  
1st repetition

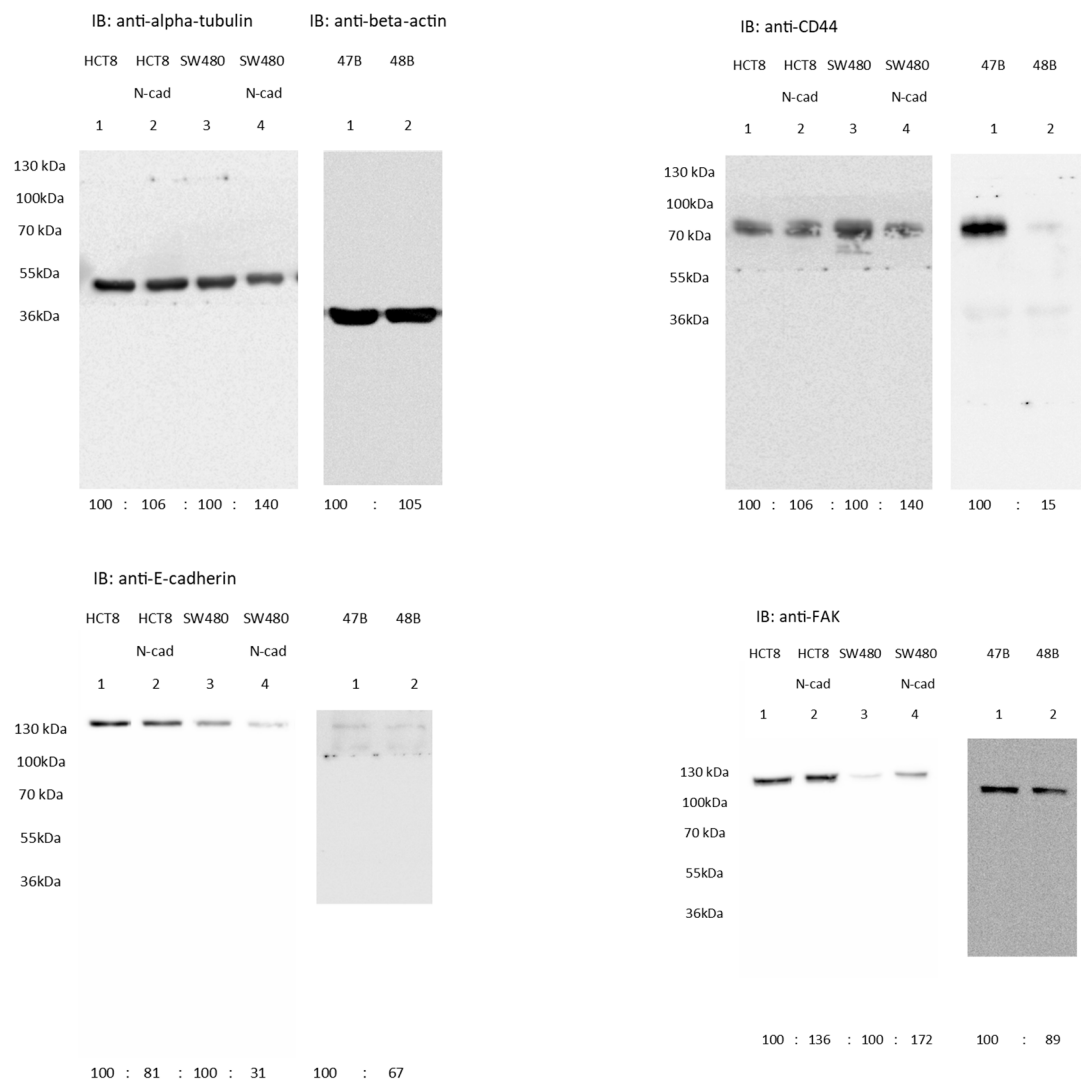

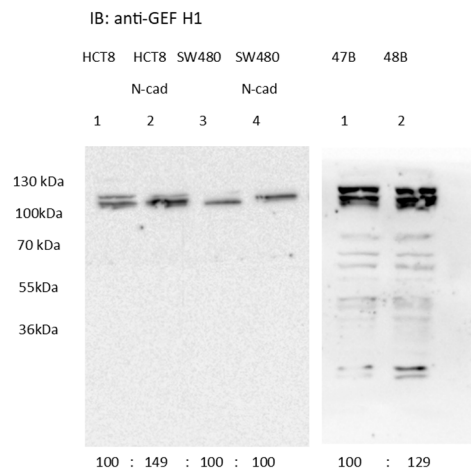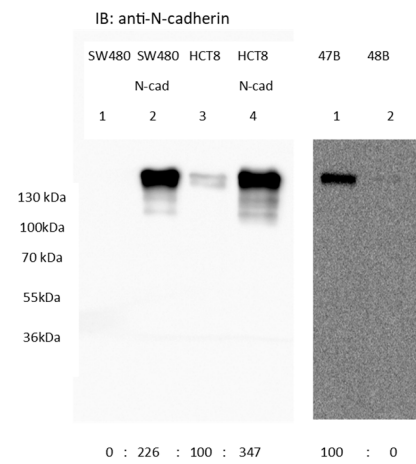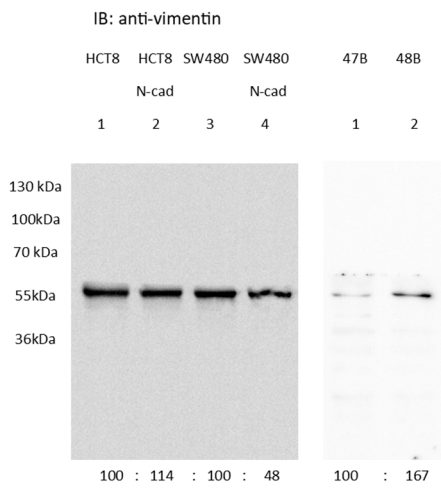

2nd repetition

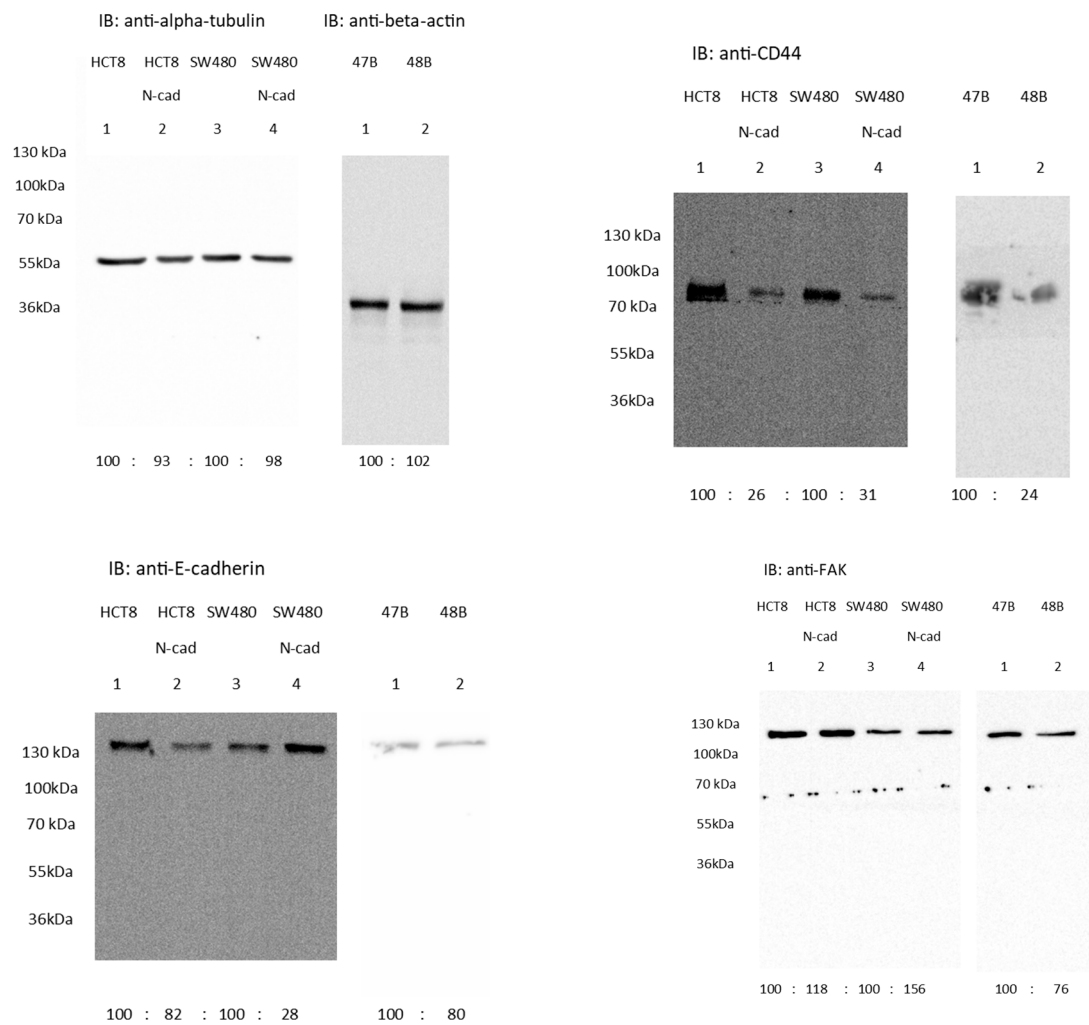

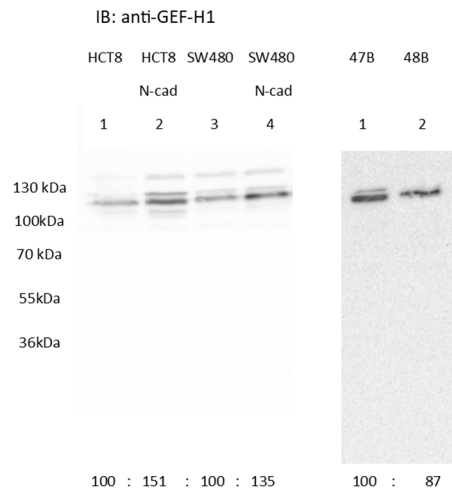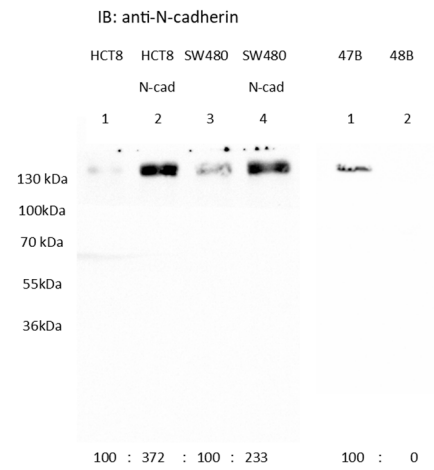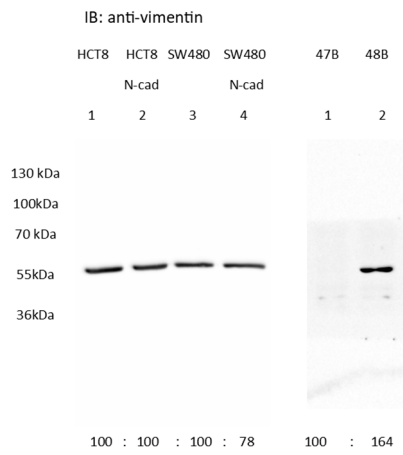

3rd repetition

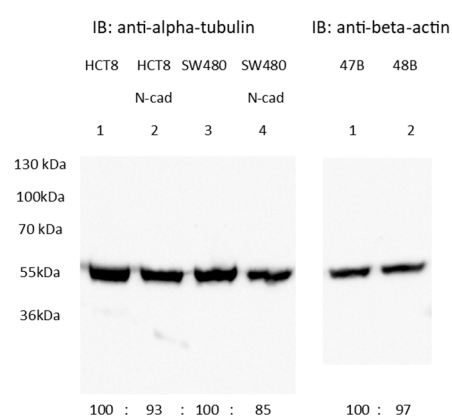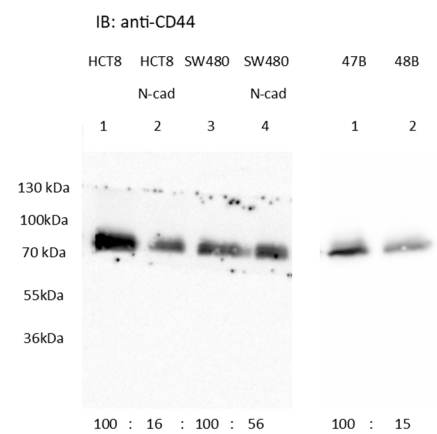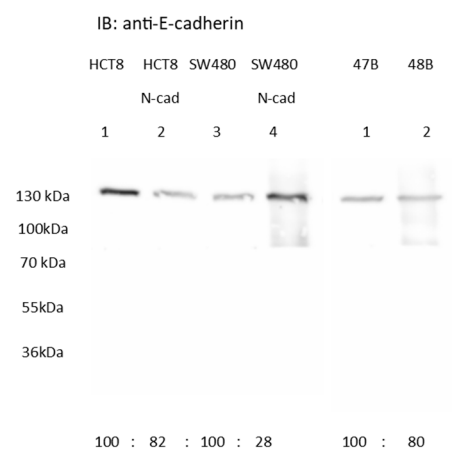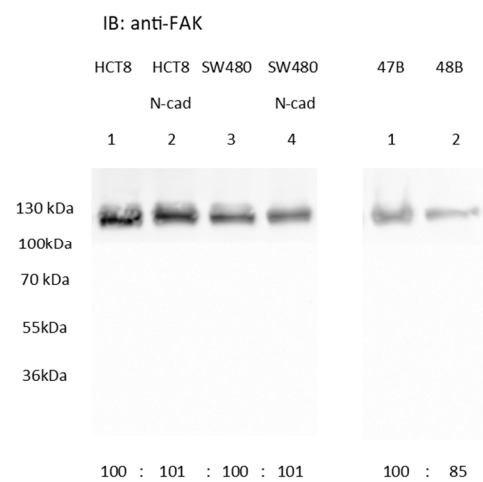

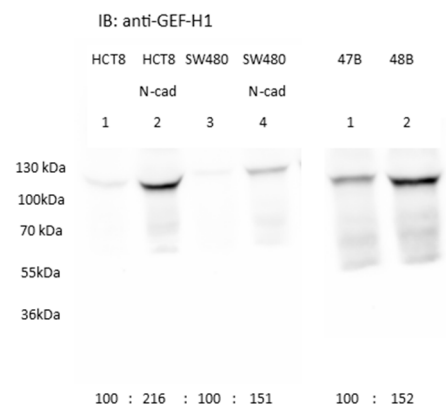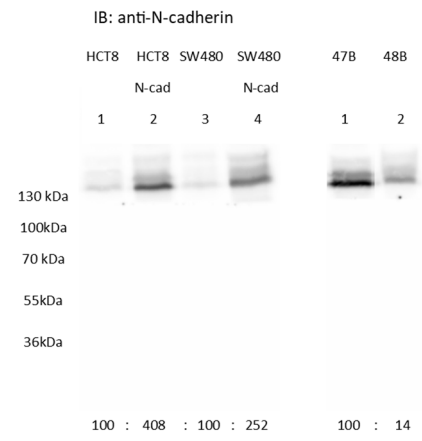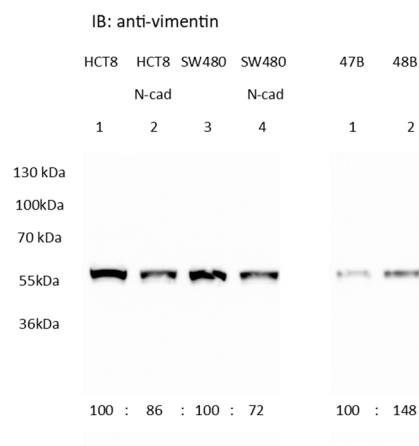

Supplement: s1 [file s1]
